# Supplementary material
Source: Springer Nature journal article supplement (https://www.springermedizin.de/resource/supplementary/12993_2012_416_MOESM2_ESM.pdf/9617710)

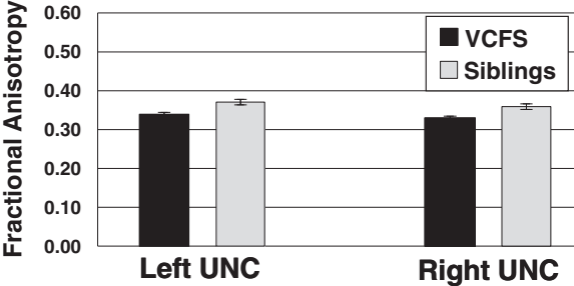

**Fractional Anisotropy**

0.60  
0.50  
0.40  
0.30  
0.20  
0.10  
0.00

**VCFS**  
**Siblings**

**Left UNC**

**Right UNC**

Supplement: MOESM2 [file 9617710]
